# Supplementary material for: Implementation of Universal School Meals during COVID-19 and beyond: Challenges and Benefits for School Meals Programs in Maine
Source: MDPI journal article supplement (doi:10.3390/nu14194031), 2022-09-28

Supplemental Figure S1. Perceptions of Sufficient School Meal Reimbursement Rates among n=43 School Food Authorities in Maine

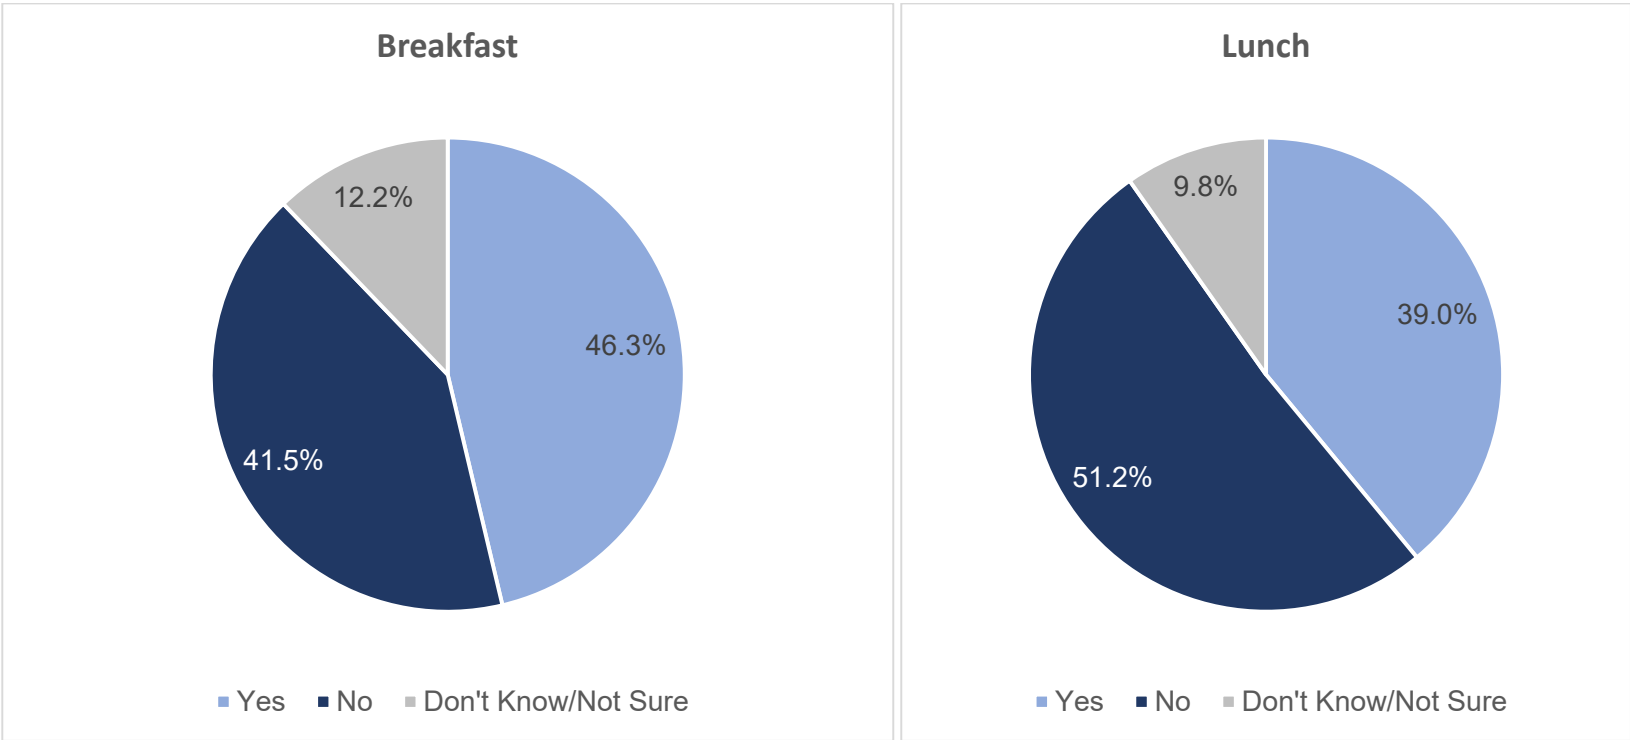

Supplement: s1 [file s1]
